# 1 **Health care workers' internal bias toward men as HIV clients in** 2 **Malawi and Mozambique: A qualitative study**

3  
4 Kathryn Dovel, PhD,<sup>1,2§</sup> Rose Paneno, MD Student<sup>1</sup>, Kelvin Balakasi, BA,<sup>2</sup>, Julie Hubbard, MSc<sup>1</sup>,  
5 Amilcar Magaço, MA<sup>3,4</sup>, Khumbo Phiri, MPH<sup>2</sup>, Thomas Coates, PhD,<sup>1</sup> Morna Cornell, PhD<sup>5</sup>

6  
7 <sup>1</sup> University of California, Los Angeles David Geffen School of Medicine

8 <sup>2</sup> Partners in Hope Medical Center, Lilongwe, Malawi

9 <sup>3</sup> Instituto Nacional de Saúde

10 <sup>4</sup> Manhica Health Research Center.

11 <sup>5</sup> Centre for Infectious Disease Epidemiology & Research, School of Public Health & Family  
12 Medicine, University of Cape Town, Cape Town, South Africa

13 **§ Corresponding Author:** Kathryn Dovel

14 Division of Infectious Diseases, David Geffen School of Medicine

15 10833 Le Conte Ave, Los Angeles, CA 90095

16 Phone: +13108838179

17 Email: [kdovel@mednet.ucla.edu](mailto:kdovel@mednet.ucla.edu) / [kldovel@gmail.com](mailto:kldovel@gmail.com)

18 KD: [KDovel@mednet.ucla.edu](mailto:KDovel@mednet.ucla.edu)

19 RP: [RPaneno@mednet.ucla.edu](mailto:RPaneno@mednet.ucla.edu)

20 KB: [kelvin@pihmalawi.com](mailto:kelvin@pihmalawi.com)

21 JH: [jhubbard@mednet.ucla.edu](mailto:jhubbard@mednet.ucla.edu)

22 AM: [magacoamilcar6@gmail.com](mailto:magacoamilcar6@gmail.com)

23 JH: [jhubbard@mednet.ucla.edu](mailto:jhubbard@mednet.ucla.edu)

24 KP: [khumbo@pihmalawi.com](mailto:khumbo@pihmalawi.com)

25 TC: [TCoates@mednet.ucla.edu](mailto:TCoates@mednet.ucla.edu)

26 MC: [morna.cornell@gmail.com](mailto:morna.cornell@gmail.com)

27

28 **Keywords:** Malawi; Mozambique; sub-Saharan Africa; health care worker; bias; men; male; HIV; health  
29 services

30 **Wordcount:** 3375/3500

31

32

33

34

35

36

37 **ABSTRACT**

38 **Background:** Men are underrepresented in HIV services throughout sub-Saharan Africa. Little is known  
39 about health care worker (HCW) perceptions of men as clients, which may directly affect the quality of  
40 care provided, and HCWs' buy-in for male-specific interventions.

41  
42 **Methods:** Focus group discussions (FGDs) were conducted in 2016 with HCWs from 15 facilities across  
43 Malawi and Mozambique, and were originally conducted to evaluate barriers to universal treatment (not  
44 gender or internal bias). FGDs were conducted in local languages, recorded, translated to English, and  
45 transcribed. For this study, we focused on HCW perceptions of men as HIV clients, using inductive and  
46 deductive coding in Atlas.ti v.8, and analyzed codes using constant comparison methods.

47  
48 **Findings:** 20 FGDs with 154 HCWs working in HIV treatment clinics were included. Median age was 30  
49 years, 59% were female, and 43% were providers versus support staff. HCWs held strong implicit bias  
50 against men as clients. Most HCWs believed men could easily navigate HIV services due to their elevated  
51 position within society, regardless of facility-level barriers faced. Men were described in pejorative terms  
52 as ill-informed and difficult clients who were absent from health systems. Men were largely seen as “bad  
53 clients” due to assumptions about men’s ‘selfish’ and ‘prideful’ nature, resulting in little HCW sympathy  
54 for men’s poor use of care.

55  
56 **Interpretation:** Our study highlights a strong implicit bias against men as HIV clients, even when gender  
57 and implicit bias were not the focus of data collection. As a result, HCWs may have little motivation to  
58 implement male-specific interventions or improve provider-patient interactions with men. Framing men  
59 as problematic places undue responsibility on individual men while minimizing institutional barriers that  
60 uniquely affect them. Implicit bias in local, national, and global discourses about men must be  
61 immediately addressed.

## 62 INTRODUCTION

63 Engaging men in HIV services is critical to curbing HIV epidemics in sub-Saharan Africa. Yet efforts to  
64 engage men have been largely suboptimal,<sup>1,2</sup> despite the rapid expansion of male-specific interventions.<sup>3,4</sup>  
65 Health care worker (HCW) perceptions of men as HIV clients may be a major barrier to men’s care,<sup>5,6</sup>  
66 particularly since HCWs are the ones required to implement male-specific interventions.

67  
68 HCWs may hold internal biases against men as clients. Men have historically been absent from global  
69 HIV guidelines and priorities,<sup>7</sup> and when they are represented, they are often depicted as problematic,  
70 difficult clients or perpetrators of local epidemics.<sup>8–10</sup> Such discourses can “trickle down” to local HCWs  
71 through HCW trainings and donor priorities.<sup>11,12</sup> Further, HCWs often have limited exposure to men as  
72 clients due to how health systems are organized to prioritize women’s reproductive health and children’s  
73 health.<sup>12</sup> In Malawi, national guidelines recommend that women of reproductive age attend a health  
74 facility 5-17 times a year for routine, non-acute services; men of the same age range are only  
75 recommended to attend once for HIV testing.<sup>13</sup> Limited exposure to men as clients may limit HCWs’  
76 comfort level interacting with men, and perpetuate broad stereotypes of men as clients.

77  
78 HCW perceptions are thus critical to improving the HIV response for men. Negative perceptions and  
79 internal bias have been linked with poor quality care among men of color in the United States and the  
80 United Kingdom,<sup>14</sup> and may have similar impact among men in sub-Saharan Africa, although to our  
81 knowledge this has not yet been studied. HCW perceptions also impact how male-specific interventions  
82 are implemented on the ground.<sup>15–17</sup> According to the theory of Street-Level Bureaucracy (SLB),  
83 frontline service workers use extensive personal discretion to prioritize certain clients or interventions  
84 over others in the context of overwhelming workloads.<sup>18</sup> Discretionary decisions are largely influenced by  
85 HCW perceptions of the clients they serve, particularly *who* is vulnerable and *why* particular populations  
86 do not succeed in care. Thus HCWs may prioritize clients perceived to be more vulnerable and worthy of  
87 focused care, while deprioritizing ‘difficult’ cases or clients deemed less “worthy.”<sup>16</sup>

88

89 A deeper understanding of HCW perceptions about men as HIV clients, *who* they see as most vulnerable  
90 to poor HIV-related outcomes, and *why* they believe men are missing from HIV services is needed to  
91 ensure effective implementation of HIV services for men. In this study, we apply constructs from SLB to  
92 qualitative data from HCWs in Malawi and Mozambique to understand HCW perceptions of men as  
93 clients.

94

## 95 **METHODS**

96 We conducted secondary analysis on data from 20 focus group discussions (FGDs) with HCWs in  
97 Malawi and Mozambique (2016-2017). The original study aimed to understand provider perceptions of  
98 barriers to care under new universal treatment policies.<sup>19,20</sup> This secondary study was conducted due to the  
99 unprompted, strong and morally charged perceptions HCWs reported about men as clients. The study  
100 included HCWs from 11 mid-level health facilities (6 in Malawi, 5 in Mozambique), with an average of  
101 two FGDs per facility. Facilities had medium to large ART cohorts, were in high HIV-burden areas, and  
102 were purposively selected by the study team to ensure representativity.

103

104 We conducted separate FGDs with ART providers and support staff (i.e., community health workers and  
105 HIV counselors). Focus group guides were developed based on existing literature on universal treatment  
106 and barriers to ART engagement. Guides included probes on differences by sex and age in these themes,  
107 but no specific questions about HCW perceptions of men as clients, vulnerability, or specific constructs  
108 from SLB. We used similar FGD guides in both countries, with questions slightly modified to ensure  
109 contextual relevance.

110

111 Two trained local research assistants led each FGD in the local language (Chichewa in Malawi and  
112 Portuguese as well as local languages including Changana and Macua, in Mozambique). FGDs lasted an

113 average of 90 minute, and were audio recorded, translated, and transcribed into English by trained staff.  
114 We conducted regular spot checks of transcripts and translations to ensure completeness and accuracy.  
115  
116 For this secondary analysis, we developed a codebook based on existing literature on HCW perceptions of  
117 men in sub-Saharan Africa,<sup>21</sup> internal bias literature,<sup>14</sup> and relevant constructs from SLB regarding HCW  
118 perceptions of clients.<sup>18</sup> RP and JH piloted the codebook on four FGD transcripts (two Malawi, two  
119 Mozambique), added iterative codes and clarified codebook definitions as needed. RM, JH, and KD  
120 reviewed the pilot coding and resolved discrepancies prior to finalizing the codebook. RP coded all  
121 remaining transcripts using the final codebook, allowing new themes to emerge using a modified  
122 grounded theory approach.<sup>22</sup> KD, JH, RP, and KB met weekly to compare codes for consistency and  
123 resolve differences across FGDs. Coded data were analyzed within the overarching framework of SLB in  
124 Atlas.ti7.5.<sup>23</sup>

125

## 126 **Ethics**

127 Ethical approval for the original trial was attained by the Institutional Review Board at University of  
128 California Los Angeles and the National Health Sciences Review Committee in Malawi. Participants  
129 were not paid for participation but were given refreshments during the FGDs. Oral consent was provided.  
130 No identifiers were collected.

131

## 132 **RESULTS**

133 We analyzed 20 FGDs with 150 HCWs who actively supported the delivery of HIV testing and treatment  
134 services in Malawi and Mozambique: 12 FGDs in Malawi (101 respondents); eight FGDs in Mozambique  
135 (49 respondents). The median age was 30 years, 59% of HCWs were female, 43% were ART providers  
136 (versus support staff), and the median duration for a career in HIV service delivery was three years (see  
137 Table 1).

138

139 **Table 1.** Demographics of Health Care Worker respondents (n=150)

| Variable                                  | Malawi (n=101) | Mozambique (n=49) | Total (n=150) |
|-------------------------------------------|----------------|-------------------|---------------|
| Age, median (IQR)                         | 31 (29-41)     | 29 (28-39)        | 30 (29-39)    |
| Female                                    | 70 (70%)       | 19 (38%)          | 59%           |
| Occupation                                |                |                   |               |
| Provider                                  | 40 (40%)       | 24 (49%)          | 64 (43%)      |
| Support Staff                             | 61 (60%)       | 25 (51%)          | 86 (57%)      |
| Years working in HIV sector, median (IQR) | 3 (2-5)        | 4 (2-7)           | 3 (2-6)       |

140

141 Two major themes emerged and are discussed below:

142

143 ***Who is vulnerable to poor HIV-related outcomes: women are vulnerable, men have safety nets***

144 Perceptions of vulnerability were frequently discussed in FGDs. HCWs often described systematic  
145 vulnerabilities experienced by women, while men were seen as having full agency to control their own  
146 health outcomes. HCWs recounted numerous stories of women being afraid to disclose their HIV-positive  
147 status for fear of losing their husband, or husbands taking the wives' treatment themselves, making it  
148 impossible for women to adhere. To HCWs, societal gender inequalities and unequal power dynamics  
149 within relationships meant that men took advantage of women, leaving women unable to navigate HIV  
150 service utilization.

151

152 *There are wives [taking ART] in hiding, and this influences her treatment adherence. Other wives*  
153 *do not reveal [their status] because they fear that the partner will beat them or they will get*  
154 *divorced. Nowadays, when the men find out [about their partners positive status], they abandon the*  
155 *family. (Mozambique, Support Staff)*

156

157 *Most women fail to start ART because of challenges related to patriarchal dominancy. Most*  
158 *men out there still think in the outdated manner that they are superior than women and as such a*  
159 *woman is prevented from making an independent decision to start ART because she is afraid that*  
160 *she will risk breaking up her marriage. (Malawi, Support Staff)*

161

162 While HCWs readily described men’s poor use of health services, they believed men brought poor health  
163 “upon themselves”. Men’s increased power within the larger society led HCWs to believe men were  
164 responsible for their own choices. External factors were seen to play a minimal role in men’s ultimate use  
165 of HIV services.

166

167 *While in men, the decision seems to be his own... Ahhh its easier for the men to start because the*  
168 *decision power he possesses. The woman, she understands. The woman understands the facts*  
169 *[about ART] very well, but the problem is in the power of decisions. (Mozambique, Support Staff)*

170

171 Some HCWs believed men were less motivated than women to seek HIV services because they had  
172 greater safety nets for health care if they became ill, making men less vulnerable to poor health outcomes.  
173 These HCWs argued that men could afford to avoid HIV services because they could rely on their wives  
174 and family to care for them. Women, however, were described as having minimal safety nets for  
175 themselves and their children, and therefore more concerned about seeking HIV services promptly since  
176 they were the only ones who would take care of themselves, and their family.

177

178 *Women are always at home taking care of the family. They also care for their [own] health as well since*  
179 *there is no one to take care of their children when they are sick. But men do not really worry about their*  
180 *[own] health because they know that if they get sick then the woman will take of him and the children.*  
181 *(Malawi, ART Provider)*

182

183 ***Why men are underrepresented in HIV services: individual men blamed for facility-level barriers***

184 Perceptions of men’s elevated status in society led HCWs to believe that men had full agency over their  
185 own health seeking behavior. Thus, while HCWs readily identified facility-level barriers to men’s care,  
186 they also believed that men should be able to overcome these barriers. Men who did not overcome  
187 facility-level barriers were generally described as “too proud” or “selfish” to access care. Below are two  
188 examples of the disconnect between barriers identified and blaming individual men.

189

190 *Men who do not overcome barriers for income-generation are too proud*

191 HCWs recognized that time and travel requirements for accessing HIV services directly conflicted with  
192 men’s role as economic providers, a role HCWs believed men internalized as a core part of their identity.

193

194 *Men are breadwinners and if a man comes here to collect ART and stumbles upon a long queue, they are*  
195 *easily discouraged to wait for an hour to get ART while they are still healthy. Instead, they start thinking*  
196 *of what they could accomplish in that one hour if they were to be working and so they choose to go back*  
197 *[home] and come back [to the facility] later when they are sick. (Malawi, ART Provider)*

198

199 However, few HCWs felt sympathetic toward the tension men experienced. Instead, they believed that  
200 most men could afford to forfeit income generation activities for monthly ART appointments, but that  
201 men chose work over HIV services due to pride and placing undue emphasis on earning money.

202

203 *Pride! Men are so proud. They feel that they are so important. Maybe due to the fact that they*  
204 *usually fend for the family and that causes them to feel that they cannot afford to be sick, let alone*  
205 *go to the hospital on a monthly basis to collect ART. (Malawi, ART Provider)*

206



207 *[Men are] Pompous! Pompous! Because they feel themselves to be of higher social status, so*  
208 *when they are told about [HIV], they don't see the negative impacts right away and they don't*  
209 *want these issues to disturb their normal [work]. (Malawi, ART Provider)*

210

211 HCWs believed men had too much power as the economic providers, and therefore would not listen to  
212 advice from their wives or HCWs. One HCW explained that since men are in control of the household,  
213 they assume the same power should extend to their health and health care.

214

215 *They are different, men and women. Women do accept their counselling very quickly compared to*  
216 *men. Men they sometimes become troublesome to accept their results, so it can be difficult ...*

217 *They are head of the family and head of their immune system [laughter]. (Malawi, ART Provider)*

218

219 *Men who do not overcome feminized health services are too selfish*

220 HCWs frequently described how health facilities were tailored to women and children, creating unique  
221 barriers to men's use of HIV services. Women were expected to attend health facilities and outreach  
222 clinics regularly for family planning, antenatal care, and children under-five years of age services, giving  
223 women extensive health information and multiple reasons to attend a health facility. In contrast, there was  
224 general consensus that men rarely attended health facilities – either for their own health or in support of  
225 others' health. As a result, men were seen as having little exposure to health education and increased risk  
226 of unwanted HIV status disclosure when seeking HIV services – why would men attend a health facility  
227 expect for HIV services?

228

229 *Because of the responsibilities that we [women] have – like falling pregnant, coming for*

230 *antenatal care, delivering the baby and looking after it – we spend more time at the hospitals*

231 *than men, and there is no way that you can be at a hospital and leave without getting some of the*

232 *crucial information that you have to know at that time. Unlike men, they shun away from*  
233 *[services]. (Malawi, ART Provider)*

234  
235 *... A lot of people haven't realized yet that this disease [HIV] is like any other. Sometimes men*  
236 *fear meeting people they know here at the health facility, and that makes them stay home [not*  
237 *start ART]. (Mozambique, Support staff)*

238  
239 While the organization of health services was widely recognized as a barrier to men's care, men who were unable  
240 or unwilling to access care through feminized health services were blamed for their poor engagement. HCWs used  
241 morally-charged language, describing these men as "irresponsible" or "too selfish" to face the additional  
242 challenges associated with female-focused services.

243  
244 *Men are usually self-centered and therefore do not see anything wrong with not taking ART,*  
245 *while women think about their families, "What will happen to my family if I fall sick?" ... men*  
246 *are too selfish, such that they don't care even when they are HIV-positive. (Malawi, Support staff)*

247  
248 *Men need punishment. If man comes to the health unit it is because he is [ill] ... [Men] are*  
249 *confusing. I think men believe that because he is a man, he can never get sick. He does not want*  
250 *to show his weakness. So that's why it takes him to the hospital unit [he becomes very sick].*  
251 *(Mozambique, Provider)*

252  
253 While HCWs recognized that men risked unwanted disclosure by simply attending an ART clinic, this did not  
254 elicit sympathy because many HCWs believed men's primary reason for avoiding disclosure was to avoid being  
255 seen as weak or "risky sexual partners". Men's fear of disclosure was thus seen as selfishly motivated, and not  
256 based on concern for their families.

257

258 *Provider 1: They [men] fear to be rejected by society, to lose their wives. That's why they do the HIV test*  
259 *in another health center ...*  
260 *Provider 2: Most men have this conception, maybe if his neighbor sees him going to hospital he will know*  
261 *that he's in that position [HIV-positive], but women don't resist much. (Mozambique, Support Staff)*

262  
263 Overall, HCW's described how individual men were expected to overcome extensive facility-based barriers to  
264 care, and men's character traits of pride and selfishness were believed to make it difficult for them to do so.

265  
266 **DISCUSSION**

267 Our study highlights a strong implicit bias against men held by both male and female HCWs in Malawi  
268 and Mozambique, even when gender and implicit bias were not the focus of the data collection process.  
269 HCWs saw women as vulnerable to poor HIV-related outcomes due to societal inequalities, and unable to  
270 overcome structural barriers to care. In contrast, most HCWs believed men could easily navigate HIV  
271 services due to their elevated position within society. Men were described in pejorative terms as ill-  
272 informed and difficult clients who were largely absent from the health care system. While HCWs  
273 recognized facility-level barriers to care for men, they had little sympathy for men, largely seeing men as  
274 "bad clients" due to assumptions about men's 'selfish' and 'prideful' character.

275  
276 HCW perceptions of men were often in direct conflict with existing literature, speaking to the disconnect  
277 between stereotypes and reality. HCWs largely described men as controlling and uncaring toward their  
278 female partners, uninterested in their own health or the health of their families, and largely absent from  
279 health facilities. Yet such stereotypes are now being refuted throughout the region. In Kenya and  
280 Tanzania, over 80% of women living with HIV reported positive male partner reactions to disclosure of  
281 their HIV status, and an overwhelming majority reported partner support for HIV service utilization<sup>24,25</sup>  
282 although fear of IPV is an established barrier to women's care.<sup>26</sup> Other studies show that men are invested  
283 in their children's well-being<sup>27</sup> and are motivated by educational and economic attainment for their

284 families.<sup>28</sup> Notably, in a community-representative survey in Malawi, 80% of men had visited a health  
285 facility within the past year, with nearly half attending facilities as caregivers for family members or  
286 friends.<sup>29</sup> These findings are in stark contrast to HCW perceptions of men as so self-absorbed that they did  
287 not care about the consequences of not accessing health services. In the USA and UK, harmful  
288 stereotypes of clients from minority groups may be used by HCWs to justify poor health outcomes and  
289 remove responsibility from HCWs or health institutions.<sup>30,31</sup> Our data suggests a similar phenomenon may  
290 be taking place for heterosexual African men within the local HIV epidemics in Malawi and  
291 Mozambique. Such stereotypes deserve immediate attention as they may negatively impact HCW buy-in  
292 and implementation of male-specific interventions,<sup>16,18</sup> and negatively impact patient-provider  
293 interactions.<sup>14</sup>

294  
295 HCWs expected men to overcome structural barriers to HIV services that were not expected of women.  
296 Men's generally elevated status in society meant that HCWs could not see men as vulnerable in other  
297 contexts, such as health service utilization. Men were believed to have enough agency to navigate their  
298 own health care, despite the numerous barriers faced. This attitude is not unique to HCWs. Vulnerability  
299 within global health is often used to describe women and children exclusively, regardless of the specific  
300 context.<sup>10,32</sup> For instance, in a recent review of 201 prominent global health organizations, only 42% had  
301 gender-responsive strategies to meet the needs of both women and men. Not one primarily targeted the  
302 health of men, even though men had worse outcomes than women in all the top ten contributors to global  
303 morbidity and mortality.<sup>33</sup> Global health must embrace more nuanced, intersectional definitions of  
304 vulnerability which acknowledge that groups who are powerful in one social sphere may be vulnerable in  
305 another.<sup>34</sup> Men face important differences in agency based on their intersectionality of identities,<sup>35,36</sup> and  
306 the structure of health systems in which they are asked to engage.<sup>12</sup>

307  
308 Negative perceptions of men as clients should not come as a surprise. Such perceptions fit neatly within  
309 the historical global discourse of men within African HIV epidemics.<sup>8-10</sup> Multilateral agency and donor

310 discourses have tended to paint men as the problem and difficult clients. While there are now positive  
311 shifts in how men are represented in HIV responses,<sup>37</sup> donor priorities and HCW trainings over the years  
312 have lasting effects on HCW perceptions. We found similar perceptions among HCWs in both Malawi  
313 and Mozambique, in different cultural and language contexts, and among male and female HCWs. Such  
314 similarities may speak to the powerful influence of multilateral bodies and funding agencies on local  
315 perceptions and lived experiences within HIV services.<sup>38</sup> Our findings also highlight the role of harmful  
316 gender norms in shaping health institutions and patient-provider interactions. Perceptions of men as a  
317 homogenous group that is strong, invincible, and with unlimited agency are key examples of HCWs  
318 internalizing harmful stereotypes regarding what is normative masculinity and how men should  
319 behave.<sup>12,39</sup>

320

321 What can be done? There is an urgent need to change global HIV discourse about men – shifting from  
322 blaming men to understanding and addressing the structural barriers men face. HIV priorities and policies  
323 of multilateral partners and donors require urgent review to reflect the complex realities faced by men and  
324 remove morally charged language about the men we are now trying to reach. Additionally, local efforts  
325 are needed to change HCW perceptions. Potential strategies include sensitization workshops for HCWs to  
326 de-stigmatize men as “bad clients”, like those used for Welcome Back campaigns<sup>40</sup> and stigmatized  
327 populations. Further, facility-level barriers should be addressed so that individual men are not responsible  
328 for overcoming structural barriers to care. Finally, it is time to recognize men’s unique vulnerability to  
329 poor service utilization and to prioritize research on HIV in heterosexual men in SSA, as well as other  
330 marginalized populations who may not frequent facilities through reproductive or children’s health  
331 services.

332

333 Several limitations should be noted. First, this was a secondary analysis and data were not collected with  
334 HCW perceptions of men in mind, potentially limiting the depth of analysis. However, this could also be  
335 regarded as a strength, in that such strongly gendered stereotypes and moral characterizing of men

336 emerged in secondary analysis of data in different contexts without prompting. Second, we are unable to  
337 differentiate between perceptions from male and female HCWs. Finally, we are unable to assess how  
338 HCW internal bias affects the quality of services. Additional research is needed on *how* such perceptions  
339 affect HCW interactions with male clients and the implementation of male-focused strategies, as well as  
340 the most effective strategies to change these negative perceptions.

341

## 342 **CONCLUSION**

343 Our study highlights the strong negative perceptions HCWs hold toward men as clients, even when  
344 implicit bias was not the focus of the data collection process. Framing men as problematic clients places  
345 undue responsibility on individual men, while minimizing health system barriers that uniquely affect  
346 them. Global, national, and local guidelines should be reviewed to minimize negative stereotypes against  
347 men. Interventions targeting men should be paired with HCW sensitization strategies to address implicit  
348 bias toward men as clients.

349

## 350 **Financial disclosure**

351 This work was funded by the Bill and Melinda Gates Foundation (INV-001423), the National Institute of  
352 Mental Health (NIMH R01-MH122308), Fogarty International (K01-TW011484-01) and UCLA GSTTP.

353

## 354 **Declaration of interests**

355 We declare no competing interests.

356

## 357 **Authors Contributions**

358 KD and RP conceptualized the study. KD is responsible for funding acquisition. KD, AM, and KP developed the  
359 parent study protocol and materials.. KD and RP developed the formal analysis plan and RP and JH analyzed the  
360 data. KD and RP wrote the original draft and JH, KB, KP, AM, TC, and MC edited following drafts. All authors  
361 have read and approved the final manuscript.

362

363

## 364 REFERENCES

365

366 1 Drammeh B, Medley A, Dale H, *et al.* Sex Differences in HIV Testing — 20 PEPFAR-Supported Sub-  
367 Saharan African Countries, 2019. *Morb Mortal Wkly Rep* 2020; **69**: 1801–6.

368 2 UNAIDS. UNAIDS data report 2018. 2019

369 <https://www.unaids.org/en/resources/documents/2018/unaids-data-2018>.

370 3 UNAIDS Platform for Action on Men and HIV. MenEngage. 2016; published online Aug 5.

371 <http://menengage.org/unaids-platform-for-action-on-men-and-hiv/> (accessed April 14, 2021).

372 4 MenStar Coalition | Ending AIDS for all. MenStar Coalit. <https://menstarcoalition.org/> (accessed April

373 14, 2021).

374 5 Ware NC, Wyatt MA, Geng EH, *et al.* Toward an Understanding of Disengagement from HIV

375 Treatment and Care in Sub-Saharan Africa: A Qualitative Study. *PLoS Med* 2013; **10**: e1001369.

376 6 Layer EH, Kennedy CE, Beckham SW, *et al.* Multi-level factors affecting entry into and engagement

377 in the HIV continuum of care in Iringa, Tanzania. *PloS One* 2014; **9**: e104961.

378 7 Dovel K, Yeatman S, Watkins S, Poulin M. Men’s heightened risk of AIDS-related death: the legacy

379 of gendered HIV testing and treatment strategies. *AIDS Lond Engl* 2015; **29**: 1123–5.

380 8 Esacove AW. Good sex/bad sex: the individualised focus of US HIV prevention policy in sub-Saharan

381 Africa, 1995-2005. *Sociol Health Illn* 2013; **35**: 33–48.

382 9 Higgins JA, Hoffman S, Dworkin SL. Rethinking gender, heterosexual men, and women’s

383 vulnerability to HIV/AIDS. *Am J Public Health* 2010; **100**: 435–45.

384 10 Poulin M, Dovel K, Watkins SC. Men with Money and the “Vulnerable Women” Client Category in

385 an AIDS Epidemic. *World Dev* 2016; **85**: 16–30.

386 11 Foley EE. Overlaps and disconnects in reproductive health care: global policies, national programs,

387 and the micropolitics of reproduction in northern Senegal. *Med Anthropol* 2007; **26**: 323–54.

388 12 Dovel K, Dworkin SL, Cornell M, Coates TJ, Yeatman S. Gendered health institutions: examining the

389 organization of health services and men’s use of HIV testing in Malawi. *J Int AIDS Soc* 2020; **23**

390 **Suppl 2**: e25517.

391 13 Yeatman S, Chamberlin S, Dovel K. Women’s (health) work: A population-based, cross-sectional

392 study of gender differences in time spent seeking health care in Malawi. *PLOS ONE* 2018; **13**:

393 e0209586.

394 14 Maina IW, Belton TD, Ginzberg S, Singh A, Johnson TJ. A decade of studying implicit racial/ethnic

395 bias in healthcare providers using the implicit association test. *Soc Sci Med* 1982 2018; **199**: 219–29.



- 396 15 Erasmus E. The use of street-level bureaucracy theory in health policy analysis in low- and middle-  
397 income countries: a meta-ethnographic synthesis. *Health Policy Plan* 2014; **29**.  
398 [https://www.cabdirect.org/cabdirect/abstract/20153106229?q=\(street+level+bureaucracy\)](https://www.cabdirect.org/cabdirect/abstract/20153106229?q=(street+level+bureaucracy)) (accessed  
399 July 6, 2020).
- 400 16 Cooper MJF, Sornalingam S, O'Donnell C. Street-level bureaucracy: an underused theoretical model  
401 for general practice? *Br J Gen Pract J R Coll Gen Pract* 2015; **65**: 376–7.
- 402 17 Gaede BM. Doctors as street-level bureaucrats in a rural hospital in South Africa. *Rural Remote Health*  
403 2016; **16**: 3461.
- 404 18 Lipsky M. Street-Level Bureaucracy, 30th Anniversary Edition: Dilemmas of the Individual in Public  
405 Service. Russell Sage Foundation, 2010.
- 406 19 Dovel K, Phiri K, Mphande M, *et al.* Optimizing Test and Treat in Malawi: health care worker  
407 perspectives on barriers and facilitators to ART initiation among HIV-infected clients who feel  
408 healthy. *Glob Health Action* 2020; **13**. DOI:10.1080/16549716.2020.1728830.
- 409 20 Nhassengo P, Cataldo F, Magaço A, *et al.* Barriers and facilitators to the uptake of Test and Treat in  
410 Mozambique: A qualitative study on patient and provider perceptions. *PloS One* 2018; **13**: e0205919.
- 411 21 Colvin CJ. Strategies for engaging men in HIV services. *Lancet HIV* 2019; **6**: e191–200.
- 412 22 Corbin, Juliet S Anselm. Basics of Qualitative Research; Techniques and Procedures for Developing  
413 Grounded Theory. San Jose State University (USA): Sage Publications, 2008  
414 <https://us.sagepub.com/en-us/nam/basics-of-qualitative-research/book235578> (accessed Dec 6, 2020).
- 415 23 GmbH. Atlas.ti.v.7. Berlin: Scientific Software Development GmbH, 1989.
- 416 24 Abuogi L, Hampanda K, Odwar T, *et al.* HIV status disclosure patterns and male partner reactions  
417 among pregnant women with HIV on lifelong ART in Western Kenya. *AIDS Care* 2020; **32**: 858–68.
- 418 25 Damian DJ, Ngahatilwa D, Fadhili H, *et al.* Factors associated with HIV status disclosure to partners  
419 and its outcomes among HIV-positive women attending Care and Treatment Clinics at Kilimanjaro  
420 region, Tanzania. *PLOS ONE* 2019; **14**: e0211921.
- 421 26 Leddy AM, Weiss E, Yam E, Pulerwitz J. Gender-based violence and engagement in biomedical HIV  
422 prevention, care and treatment: a scoping review. *BMC Public Health* 2019; **19**: 897.
- 423 27 Temelkovska, Tijana, Pericles Kalande, Evelyn Udedi, Lauri Burns, Julie Hubbard, Sundeep Gupta,  
424 Linda Richter, Thomas Coates, Kathryn Dovel. Men care too: The impact of an Early Childhood  
425 Development (ECD) program among HIV-positive mothers on father engagement in ECD. *AIDS*  
426 *Conference, Mexico City*, 2019.
- 427 28 Daniels J, Medina-Marino A, Glockner K, Grew E, Ngcelwane N, Kipp A. Masculinity, resources, and  
428 retention in care: South African men's behaviors and experiences while engaged in TB care and  
429 treatment. *Soc Sci Med* 1982 2021; **270**: 113639.
- 430 29 Dovel K, Balakasi K, Gupta S, *et al.* Missing men or missed opportunity? Men's frequent use of health  
431 services in Malawi. *AIDS Conference, San Francisco*, 2020.



- 432 30 Scott KA, Britton L, McLemore MR. The Ethics of Perinatal Care for Black Women: Dismantling the  
433 Structural Racism in “Mother Blame” Narratives. *J Perinat Neonatal Nurs* 2019; **33**: 108–15.
- 434 31 Gollust SE, Cunningham BA, Bokhour BG, *et al*. What Causes Racial Health Care Disparities? A  
435 Mixed-Methods Study Reveals Variability in How Health Care Providers Perceive Causal  
436 Attributions. *Inq J Health Care Organ Provis Financ* 2018; **55**: 0046958018762840.
- 437 32 Allotey P, Reidpath DD. Sexual and reproductive health and rights post 2015—challenges and  
438 opportunities. *BJOG Int J Obstet Gynaecol* 2015; **122**: 152–5.
- 439 33 Global Health 50/50. Flying Blind in the Time of Crisis: Global Health 50/50.  
440 <https://globalhealth5050.org> (accessed April 13, 2021).
- 441 34 Hankivsky O. Women’s health, men’s health, and gender and health: implications of intersectionality.  
442 *Soc Sci Med* 1982 2012; **74**: 1712–20.
- 443 35 Dworkin SL. Who is epidemiologically fathomable in the HIV/AIDS epidemic? Gender, sexuality, and  
444 intersectionality in public health. *Cult Health Sex* 2005; **7**: 615–23.
- 445 36 Heise L, Greene ME, Opper N, *et al*. Gender inequality and restrictive gender norms: framing the  
446 challenges to health. *Lancet Lond Engl* 2019; **393**: 2440–54.
- 447 37 Grimsrud A, Ameyan W, Ayieko J, Shewchuk T. Shifting the narrative: from “the missing men” to  
448 “we are missing the men”. *J Int AIDS Soc* 2020; **23**: e25526.
- 449 38 Dovel K. Shifting Focus from Individuals to Institutions: the Role of Gendered Health Institutions on  
450 Men’s Use of HIV Services. 2016; published online May 29.  
451 <https://pqdopen.proquest.com/doc/1796054414.html?FMT=ABS> (accessed Dec 14, 2020).
- 452 39 Morgan R, Ayiasi RM, Barman D, *et al*. Gendered health systems: evidence from low- and middle-  
453 income countries. *Health Res Policy Syst* 2018; **16**: 58.
- 454 40 MSF’s Welcome Service: Supporting re-engagement with care.  
455 <https://samumsf.org/sites/default/files/2019-06/Welcome%20Services.pdf> (accessed April 13, 2021).
- 456
